1                   **Carriage of a single strain of non-toxicogenic *Corynebacterium diphtheriae***  
2                                   **biovar Belfanti (*Corynebacterium belfantii*)**  
3                                           **in four patients with cystic fibrosis**

4  
5 Diane Pivot<sup>1</sup>, Annlyse Fanton<sup>2</sup>, Edgar Badell-Ocando<sup>3,4</sup>, Marion Benouachkou<sup>1</sup>, Karine  
6 Astruc<sup>1</sup>, Frederic Huet<sup>2</sup>, Lucie Amoureux<sup>5</sup>, Catherine Neuwirth<sup>5</sup>, Alexis Criscuolo<sup>6</sup>, Serge  
7 Aho<sup>1</sup>, Julie Toubiana<sup>3,4</sup> and Sylvain Brisse<sup>3,4,\*</sup>

8  
9 <sup>1</sup> Epidemiology and Hygiene Department, Dijon University Hospital, Dijon, France

10 <sup>2</sup> Centre de Ressources et de Compétences de la Mucoviscidose (CRCM), Dijon, Hôpital  
11 d'Enfants, Dijon, France

12 <sup>3</sup> Institut Pasteur, Biodiversity and Epidemiology of Bacterial Pathogens, Paris, France

13 <sup>4</sup> National Reference Center for Corynebacteria of the *diphtheriae* complex, Paris, France

14 <sup>5</sup> Bacteriology Department, Dijon University Hospital, Dijon, France

15 <sup>6</sup> Institut Pasteur, Bioinformatics and Biostatistics Hub, C3BI, USR 3756 IP CNRS, Paris,  
16 France

17

18 \* Corresponding author

19

20 **Running title:** *C. diphtheriae* in cystic fibrosis

21 **ABSTRACT**

22 Cystic fibrosis (CF) patients are commonly colonized by bacterial pathogens, which can  
23 induce persistent lung inflammation and may contribute to clinical deterioration. Colonization  
24 of CF patients and cross-transmission by *Corynebacterium diphtheriae* has not been reported  
25 so far. The aim of this article was to investigate the possibility of a cross transmission of  
26 *C. diphtheriae* biovar Belfanti between four patients of a CF center. *C. diphtheriae* biovar  
27 belfanti (now formally called *C. belfantii*) isolates were collected from four patients in a  
28 single CF care center over a 6 years period and analyzed by microbiological methods and  
29 whole genome sequencing. Epidemiological links among patients were investigated. Ten  
30 isolates were collected from 4 patients. Whole genome sequencing of one isolate from each  
31 patient showed that a single strain was shared among them. In addition, one patient had the  
32 same strain on two consecutive samplings nine months apart. The strain was non-toxigenic  
33 and was susceptible to most antimicrobial agents. Ciprofloxacin resistance was observed in  
34 one patient. Transmission of the strain among patients was supported by the occurrence of  
35 same-day visits to the CF center. This study demonstrates colonization of CF patients by  
36 *C. diphtheriae* biovar Belfanti (*C. belfantii*) and shows persistence and transmission of a  
37 unique strain during at least six years in a single CF patient care center.

38

39

40 **Keywords:** cystic fibrosis; colonization; *Corynebacterium diphtheriae*; *Corynebacterium*  
41 *belfantii*; epidemiology; genomic sequencing; transmission

42 **Abbreviations**

43 CF: cystic fibrosis

44 MLST: multilocus sequence typing

45 MALDI-TOF: Matrix-assisted laser desorption/ionization time-of-flight

46

47 **Potential conflicts of interest**

48 All authors report no conflicts of interest

49

50 **Funding**

51 This work was supported financially by Dijon University Hospital, Institut Pasteur and Public  
52 Health France.

53

54 **Previous meeting presentations**

55 The information in this work was not previously presented in any meeting.

56

57 **Corresponding author:** Sylvain Brisse. Biodiversity and Epidemiology of Bacterial

58 Pathogens, Institut Pasteur, 25 rue du Docteur Roux, F-75724 Paris, France.

59 E-mail: [sylvain.brisse@pasteur.fr](mailto:sylvain.brisse@pasteur.fr); Phone +33 1 45 68 83 34

60

61 **Accession numbers**

62 The genomic sequence data generated in this work were submitted to the European

63 Nucleotide Archive and are available from the International Nucleotide Sequence Database

64 Collaboration (NCBI/ENA/DDBJ) databases under project accession number PRJEB28372

65 and run data accession numbers ERR2757916 to ERR2757921.

## 66 INTRODUCTION

67 A large fraction of the mortality of cystic fibrosis (CF) patients is attributed to infections of  
68 the respiratory tract, which can be caused by multiple pathogens, and cross-transmission  
69 within CF centers themselves is an important healthcare related issue (1, 2)(3). The genus  
70 *Corynebacterium* includes a high number of pathogens, most of them being opportunistic (4).  
71 So far, only *C. pseudodiphtheriticum*, *C. propinquum* and *C. accolens* were reported from CF  
72 patients (5–7). *C. diphtheriae*, the most pathogenic *Corynebacterium* species that causes  
73 diphtheria, was not reported in pauci- or asymptomatic CF lung colonization to our  
74 knowledge. Typical diphtheria is caused by strains that produce the diphtheria toxin.  
75 Although the disease has almost disappeared in countries with high toxoid vaccine coverage,  
76 the pathogen still circulates in the human population (8–10). Further, non-toxigenic  
77 *C. diphtheriae* strains can be recovered from a variety of infections including respiratory tract  
78 infections, skin infections and bacteremia (11, 12). Three biovars of *C. diphtheriae* are  
79 distinguished by biochemical characteristics. Whereas biovars Mitis and Gravis can harbor  
80 the diphtheria toxin gene, biovar Belfanti isolates were only exceptionally described as  
81 toxigenic (13–15). Recently, *C. diphtheriae* biovar Belfanti isolates were recognized as  
82 representing a novel species called *C. belfantii* (16). The aim of this study was to investigate  
83 potential cross-transmission within a group of four patients with lower respiratory tract  
84 colonization by nontoxigenic *C. diphtheriae*. These patients were followed in a single CF  
85 center during a period of six years, and our genomic analyses showed that they were  
86 colonized by a single *C. diphtheriae* strain.

## 87 **METHODS**

### 88 **Identification of cases**

89           Cases were identified in the regional consultation CF Center of a university hospital  
90 between January 2011 and November 2016. During their visits at the center, patients are  
91 screened for the presence of opportunistic infectious agents and the evolution of antimicrobial  
92 resistance is monitored. The inclusion of cases was performed retrospectively based on at  
93 least one sample positive for *C. diphtheriae* upon microbiological screening from sputum or  
94 induced sputum. Clinical and laboratory data (sex, age at the time of diagnosis, pulmonary  
95 functionality, long-term or sequential antibiotic therapies, symptomatology at the time of  
96 diagnosis, respiratory co-infections) were collected for each patient.

97

### 98 **Epidemiological investigations**

99           The CF center includes three wards (consultation, pulmonary function testing and  
100 chest physiotherapy) and an imaging department. The timeline of patients visits to the various  
101 wards of the CF center was investigated from their clinical records. Patients undergo chest  
102 physiotherapy either before or after their consultation with the physician, and a sputum  
103 specimen was systematically collected. Afterwards, they are directed to the pulmonary  
104 function testing ward.

105           To investigate infection control measures and detect possible factors that might have  
106 favored patient-to-patient transmission, all healthcare workers of the three wards who had  
107 worked during the study period were met and interviewed about implementation of standard  
108 precautions, material management and patient care organization. Besides, healthcare workers  
109 who were in charge of the included patients were screened based on a voluntary basis at the  
110 time of the study (June to October 2017) for *C. diphtheriae* colonization in the nasopharynx.  
111 For this purpose, swabs were plated onto blood agar medium, on which five fosfomycin disks

112 (50 µg/disk) were then deposited. Colonies growing around the disks after 18-24 h at 37°C  
113 were sub-cultivated on Tinsdale medium agar and incubated at 37°C.

114

### 115 **Bacterial identification and characterization**

116 The isolates were identified as *C. diphtheriae* at the local microbiology laboratory by  
117 MALDI-TOF (Bruker) since Sept. 2016, or using API Coryne (bioMérieux) until August  
118 2016. Confirmatory analysis and *tox* gene detection were performed at the National Reference  
119 Center. The biovar of isolates was determined based on the combination of nitrate reductase  
120 (positive in Mitis and Gravis, negative in Belfanti) and glycogen fermentation (positive in  
121 Gravis only). Antimicrobial susceptibility was characterized by the disk diffusion method  
122 (Bio-Rad, Marnes-la-Coquette, France) and the minimum inhibitory concentration was  
123 determined by the E-test method (BioMérieux, Marcy l'Etoile, France). The sensitivity was  
124 interpreted using CA-SFM/EUCAST V.1.0 (mars 2017) criteria for *Corynebacterium*  
125 ([http://www.sfm-microbiologie.org/UserFiles/files/casfm/CASFMV1\\_0\\_MARS\\_2017.pdf](http://www.sfm-microbiologie.org/UserFiles/files/casfm/CASFMV1_0_MARS_2017.pdf)).

126 Susceptibility was tested for the following antimicrobial agents: vancomycin, kanamycin,  
127 gentamycin, penicillin G, oxacillin, amoxicillin, imipenem, cefotaxime, clindamycin,  
128 azithromycin, spiramycin, clarithromycin, erythromycin, ciprofloxacin, moxifloxacin,  
129 cotrimoxazole, trimethoprim, sulfonamide, pristinamycin, rifampicin, tetracyclin and  
130 linezolid. Genomic sequencing was performed using a NextSeq-500 instrument (Illumina, San  
131 Diego, USA) with a 2 x 150 nt paired-end protocol and based on Nextera libraries. Contig  
132 sequences were assembled using SPAdes v3.9 (<http://cab.spbu.ru/software/spades/>).  
133 Multilocus sequence typing (MLST) was performed from genomic assemblies using the  
134 international nomenclature database webpage (<https://pubmlst.org/cdiphtheriae/>). Read  
135 mapping and calling of high quality single nucleotide polymorphisms (SNP) were performed  
136 as described (17). Identification to *C. belfantii* was performed by genomic comparison with

137 the type strains of *C. belfantii* and *C. diphtheriae* based on the average nucleotide identity  
138 metric calculated with JspeciesWS (18) as in (16).

139

140 **Ethical statement**

141 The work was conducted in accordance with local and national regulation, as well as the  
142 Helsinki Declaration, and was approved by the local Ethics committee (Committee for the  
143 Protection of Persons EST I, France).

144 **RESULTS**

145 **Patients.** From January 2011 to November 2016, four patients of the CF Center had positive  
146 screening respiratory samples for *C. diphtheriae*. This species was identified from these  
147 patients because of the presence of abundant, even though not numerically dominant,  
148 coryneform gram-positive colonies in their oropharyngeal microbiological flora. The timeline  
149 of patients visits to the CF center and detection of *C. diphtheriae* is represented in **Figure 1**.  
150 The patient characteristics and medical records are summarized in **Table 1**. Only patients 2  
151 and 4 presented with respiratory exacerbation at the time of *C. diphtheriae* detection and  
152 received antibiotics, but they did not require hospitalization. None of the four patients had a  
153 dermatological disease or chronic wound. Patient 2 was positive for *C. diphtheriae* during at  
154 least 15 months.

155

156 **Phenotypic and molecular identification of the isolates.** One isolate from patients 1  
157 (February 2011), 3 (January 2016) and 4 (November 2016), and 2 isolates from patient 2  
158 collected 9 months apart (April 2015, January 2016), were stored and available for analysis  
159 (**Figure 1**). The five isolates were identified as *C. diphtheriae*. None of the isolates was  
160 toxigenic and all were of biovar Belfanti. MLST showed that the five isolates belonged to the  
161 same sequence type, ST208. Whole-genome sequence variation among the 5 isolates revealed  
162 only 62 SNPs among them. The largest SNP distance between two isolates was 58 SNPs,  
163 observed between isolates FRC0074 and FRC0381. Hence, the five isolates were very closely  
164 related, showing that they belong to a single strain. Phylogenetic analysis based on SNPs  
165 (**Figure S1**) revealed three subtypes, comprising respectively (1) the isolate from patient 1  
166 (FRC0074); (2) One isolate from patient 2 (isolate FRC0318) and the isolate from patient 3  
167 (FRC0381); and (3) The other isolate (FRC0382) from patient 2 and the isolate from patient 4  
168 (FRC0455). Within subtypes, only eighteen SNPs separated FRC0318 and FRC0381, and 4



169 SNPs separated FRC0382 and FRC0455. Following the recent description of *C. belfantii* (16),  
170 the five isolates were re-identified based on their genomic sequence. Their average nucleotide  
171 identity with *C. belfantii* type strain (FRC0043<sup>T</sup>) was 99.47%, whereas it was only 94.89%  
172 with NCTC11397<sup>T</sup>, the type strain of *C. diphtheriae*. Therefore, the five isolates belong to the  
173 novel species *C. belfantii*.

174 Antimicrobial susceptibility profiles of the five isolates showed that they were  
175 susceptible to all antimicrobial agents, with one remarkable exception: isolate FRC0074 from  
176 patient 1 was non-susceptible to ciprofloxacin. Genomic sequence inspection showed that this  
177 isolate had a unique mutation, A to G at position 277 of the *gyrA* gene, coding for subunit A  
178 of gyrase, the target of ciprofloxacin. This SNP corresponds to a deduced amino-acid change  
179 of D to N at protein position 91, which is located within the quinolone-resistance determining  
180 region of the gyrase of *Corynebacteria*.

181

182 **Investigations of possible strain transmission risks.** Patient 1 had no recorded contact  
183 opportunity with the three other patients at the clinic. In contrast, patients 2 and 3 visited the  
184 CF center the same day on eight occasions for consultations, physiotherapy or for pulmonary  
185 function tests between January 2014 and November 2016 (**Figure 1**). Further, patient 4 had a  
186 consultation and physiotherapy session 30 minutes after patient 2 in April 2016 and then in  
187 November 2016, on the day when he had a positive expectoration sample for *C. diphtheriae*.  
188 In addition, patient 4 had a pulmonary function test on the same day as patient 2 in September  
189 2014 and November 2016 (**Figure 1**). Therefore, several opportunities for cross-transmission  
190 within the CF center were identified among patients 2, 3 and 4, even though social interaction  
191 between CF patients was not identified.

192 Inspections of hygiene measures was retrospectively conducted by the infection  
193 control team between June 2016 and June 2017. Local infection control protocols and

194 recommendations regarding healthcare staff hygiene (mostly masks, disposable mouthpieces  
195 and filters, specific equipment and hand hygiene) and rooms and equipment disinfection were  
196 correctly observed. However, it was noted that the salbutamol inhalation chamber was  
197 disinfected with low-level disinfectant instead of a mid-level disinfectant. Furthermore, after  
198 their physiotherapy session, patients did not always wear masks while undergoing pulmonary  
199 function testing.

200 Ten healthcare workers of the CF center who were regularly in contact with the four  
201 patients were retrospectively screened for throat colonization by *C. diphtheriae*. No  
202 *Corynebacterium* was isolated in any of the samples from the screened workers.

## 203 DISCUSSION

204 We report four cases of CF patients colonization by non-toxigenic *C. diphtheriae* biovar  
205 Belfanti (now formally called *C. belfantii*). To our knowledge, *C. diphtheriae* was never  
206 described from CF patients. Although non-toxigenic isolates can cause a variety of infections,  
207 including bacteremia (11), two patients were not symptomatic, whereas the two other had  
208 lung exacerbation at the time of first *C. diphtheriae* detection. Other opportunist pathogens of  
209 the *Corynebacterium* genus might be involved in CF lung exacerbations (5, 19). In recent  
210 years, *C. diphtheriae* became easier to identify by the use of MALDI-TOF. However, *C.*  
211 *diphtheriae* may still be difficult to detect in the CF lungs, given the polymicrobial  
212 colonization occurring in most samples, as was observed during this study (**Table 1**). It is  
213 therefore not unlikely that additional cases of colonization might have gone undetected.

214 Multiple CF patients are typically followed in a given CF center, which creates  
215 opportunities for bacterial transmission among patients despite the enforcement of strong  
216 infection control measures. A strong suspicion of cross-transmission of *C. diphtheriae*  
217 between four patients in our clinic arose given the repeated observation of patients colonized  
218 by *C. diphtheriae*. Microbiological investigations fully supported the hypothesis of a single  
219 strain. MLST showed that the five isolates belonged to the same sequence type. The MLST  
220 genotype of the isolates, ST208, was not reported previously in the *C. diphtheriae* MLST  
221 database, suggesting that it is not common. Whole genome sequencing defines the genetic  
222 relatedness among *C. diphtheriae* isolates with high precision (20–22). This approach  
223 demonstrated that the five isolates belong to the same strain and provided strong support to  
224 the hypothesis of cross transmission among patients and/or contamination from a common  
225 source. Besides, the data showed that the strain persisted within patient 2 for at least 9  
226 months. Unfortunately, the additional isolates detected from patient 2 and 3 were not stored.

227 The SNP variation uncovered by the genomic analysis reflects evolution of the strain  
228 since the last common ancestor of the five isolates. Three subtypes were distinguished, two of  
229 which comprised isolates from two patients. Subtypes shared by patients may reflect direct  
230 transmission between them. Epidemiological investigations support this possibility in one  
231 case, as patients 2 and 3 had simultaneous visits to the CF center on several occasions.  
232 However, knowledge on subtype diversity within patients would be required to infer  
233 transmission chains with confidence (23). In this study, only one isolate was kept and  
234 characterized from each sample. Therefore, one cannot exclude that subtypes coexisted within  
235 single patients, which would lead to the possibility of other transmission patterns than those  
236 suggested by the phylogeny.

237 Biovar Belfanti of *C. diphtheriae* (*C. belfantii*) is commonly isolated from the respiratory  
238 tract, generally from the nose or throat and often in association with ozaena (24). In contrast,  
239 its isolation from skin infections is extremely rare. Therefore, skin wounds of patients or the  
240 personnel is an unlikely reservoir. Transmission by direct respiratory contamination between  
241 patients appears as the most likely transmission route. Transmission of *C. striatum* in an  
242 intensive care unit and silent transmission of *C. pseudodiphtheriticum* among CF patients  
243 were previously reported (5, 25).

244 Evolution of antimicrobial resistance occurs frequently in bacterial isolates that colonize  
245 CF lungs (26). Our results showed ciprofloxacin resistance in one isolate, whereas the others  
246 were susceptible. As no prescription of quinolone antimicrobials was recorded for this patient,  
247 one possibility is that the strain had evolved resistance to ciprofloxacin in another  
248 ciprofloxacin-treated patient, in which the strain was not detected.

249 The main limitation of this study is that the infection control investigation was performed  
250 retrospectively and that no detailed pattern of transmission could therefore be ascertained.  
251 Healthcare workers or the materials used for patient care may have played the role of vector

252 of *C. diphtheriae* between the patients (27), even though the retrospective screening did not  
253 reveal a potential carrier or source of infection. Further, hidden patient-to-patient cross  
254 transmission cannot be excluded, as some patients may have been undetected for  
255 *C. diphtheriae* carriage. Further studies are needed to better define carriage of *C. diphtheriae*  
256 by CF patients and to investigate the possible role of patients, healthcare workers or  
257 environmental sources in cross transmission. In addition, the clinical significance of non-  
258 toxigenic *C. diphtheriae* will need to be determined in order to define strategies of treatment,  
259 prevention and control of contamination of CF patients by this bacterial pathogen.

260

## 261 **Acknowledgements**

262 We acknowledge the help of Melody Dazas and Annick Carmi-Leroy for the microbiological  
263 characterization of the isolates. We thank the “Plateforme de Microbiologie Mutualisée” from  
264 Institut Pasteur for genomic sequencing.

265

## 266 **References**

- 267 1. Lipuma JJ. 2010. The changing microbial epidemiology in cystic fibrosis. Clin  
268 Microbiol Rev 23:299–323.
- 269 2. Saiman L. 2011. Infection prevention and control in cystic fibrosis. Curr Opin Infect Dis  
270 24:390–395.
- 271 3. Schaffer K. 2015. Epidemiology of infection and current guidelines for infection  
272 prevention in cystic fibrosis patients. J Hosp Infect 89:309–313.
- 273 4. Funke G, von Graevenitz A, Clarridge JE, Bernard KA. 1997. Clinical microbiology of  
274 coryneform bacteria. Clin Microbiol Rev 10:125–159.

- 275 5. Bittar F, Cassagne C, Bosdure E, Stremler N, Dubus JC, Sarles J, Reynaud-Gaubert M,  
276 Raoult D, Rolain J-M. 2010. Outbreak of *Corynebacterium pseudodiphtheriticum*  
277 infection in cystic fibrosis patients, France. *Emerging Infect Dis* 16:1231–1236.
- 278 6. Prevaes SMPJ, de Winter-de Groot KM, Janssens HM, de Steenhuijsen Piters WAA,  
279 Tramper-Stranders GA, Wyllie AL, Hasrat R, Tiddens HA, van Westreenen M, van der  
280 Ent CK, Sanders EAM, Bogaert D. 2016. Development of the Nasopharyngeal  
281 Microbiota in Infants with Cystic Fibrosis. *Am J Respir Crit Care Med* 193:504–515.
- 282 7. Renwick J, McNally P, John B, DeSantis T, Linnane B, Murphy P, SHIELD CF. 2014.  
283 The microbial community of the cystic fibrosis airway is disrupted in early life. *PLoS*  
284 *ONE* 9:e109798.
- 285 8. Hoskisson PA. 2018. Microbe Profile: *Corynebacterium diphtheriae* – an old foe always  
286 ready to seize opportunity. *Microbiology* 164:865–867.
- 287 9. Zakikhany K, Efstratiou A. 2012. Diphtheria in Europe: current problems and new  
288 challenges. *Future Microbiol* 7:595–607.
- 289 10. Lodeiro-Colatosti A, Reischl U, Holzmann T, Hernández-Pereira CE, Rísquez A, Paniz-  
290 Mondolfi AE. 2018. Diphtheria Outbreak in Amerindian Communities, Wonken,  
291 Venezuela, 2016-2017. *Emerging Infect Dis* 24:1340–1344.
- 292 11. Patey O, Bimet F, Riegel P, Halioua B, Emond JP, Estrangin E, Dellion S, Alonso JM,  
293 Kiredjian M, Dublanchet A, Lafaix C. 1997. Clinical and molecular study of  
294 *Corynebacterium diphtheriae* systemic infections in France. Coryne Study Group. *J Clin*  
295 *Microbiol* 35:441–445.

- 296 12. Wilson AP. 1995. The return of *Corynebacterium diphtheriae*: the rise of non-toxigenic  
297 strains. *J Hosp Infect* 30 Suppl:306–312.
- 298 13. Bolt F, Cassiday P, Tondella ML, Dezoysa A, Efstratiou A, Sing A, Zasada A, Bernard  
299 K, Guiso N, Badell E, Rosso M-L, Baldwin A, Dowson C. 2010. Multilocus sequence  
300 typing identifies evidence for recombination and two distinct lineages of  
301 *Corynebacterium diphtheriae*. *J Clin Microbiol* 48:4177–4185.
- 302 14. Efstratiou A, George RC. 1999. Laboratory guidelines for the diagnosis of infections  
303 caused by *Corynebacterium diphtheriae* and *C. ulcerans*. World Health Organization.  
304 *Commun Dis Public Health* 2:250–257.
- 305 15. Pimenta FP, Matias GAM, Pereira GA, Camello TCF, Alves GB, Rosa ACP, Hirata R,  
306 Mattos-Guaraldi AL. 2008. A PCR for *dtxR* gene: application to diagnosis of non-  
307 toxigenic and toxigenic *Corynebacterium diphtheriae*. *Mol Cell Probes* 22:189–192.
- 308 16. Dzas M, Badell E, Carmi-Leroy A, Criscuolo A, Brisse S. 2018. Taxonomic status of  
309 *Corynebacterium diphtheriae* biovar Belfanti and proposal of *Corynebacterium belfantii*  
310 sp. nov. *Int J Syst Evol Microbiol* 68:3826–3831.
- 311 17. Bouchez V, Guglielmini J, Dzas M, Landier A, Toubiana J, Guillot S, Criscuolo A,  
312 Brisse S. 2018. Genomic Sequencing of *Bordetella pertussis* for Epidemiology and  
313 Global Surveillance of Whooping Cough. *Emerging Infect Dis* 24:988–994.
- 314 18. Richter M, Rosselló-Móra R, Oliver Glöckner F, Peplies J. 2016. JSpeciesWS: a web  
315 server for prokaryotic species circumscription based on pairwise genome comparison.  
316 *Bioinformatics* 32:929–931.

- 317 19. Freeman JD, Smith HJ, Haines HG, Hellyar AG. 1994. Seven patients with respiratory  
318 infections due to *Corynebacterium pseudodiphtheriticum*. *Pathology* 26:311–314.
- 319 20. Dangel A, Berger A, Konrad R, Bischoff H, Sing A. 2018. Geographically Diverse  
320 Clusters of Nontoxigenic *Corynebacterium diphtheriae* Infection, Germany, 2016-2017.  
321 *Emerging Infect Dis* 24:1239–1245.
- 322 21. Grosse-Kock S, Kolodkina V, Schwalbe EC, Blom J, Burkovski A, Hoskisson PA,  
323 Brisse S, Smith D, Sutcliffe IC, Titov L, Sangal V. 2017. Genomic analysis of endemic  
324 clones of toxigenic and non-toxigenic *Corynebacterium diphtheriae* in Belarus during  
325 and after the major epidemic in 1990s. *BMC Genomics* 18:873.
- 326 22. Meinel DM, Kuehl R, Zbinden R, Boskova V, Garzoni C, Fadini D, Dolina M, Blümel  
327 B, Weibel T, Tschudin-Sutter S, Widmer AF, Bielicki JA, Dierig A, Heininger U,  
328 Konrad R, Berger A, Hinic V, Goldenberger D, Blaich A, Stadler T, Battegay M, Sing  
329 A, Egli A. 2016. Outbreak investigation for toxigenic *Corynebacterium diphtheriae*  
330 wound infections in refugees from Northeast Africa and Syria in Switzerland and  
331 Germany by whole genome sequencing. *Clin Microbiol Infect* 22:1003.e1-1003.e8.
- 332 23. Klinkenberg D, Backer JA, Didelot X, Colijn C, Wallinga J. 2017. Simultaneous  
333 inference of phylogenetic and transmission trees in infectious disease outbreaks. *PLoS*  
334 *Comput Biol* 13:e1005495.
- 335 24. Farfour E, Badell E, Dinu S, Guillot S, Guiso N. 2013. Microbiological changes and  
336 diversity in autochthonous non-toxigenic *Corynebacterium diphtheriae* isolated in  
337 France. *Clin Microbiol Infect* 19:980–987.



- 338 25. Leonard RB, Nowowiejski DJ, Warren JJ, Finn DJ, Coyle MB. 1994. Molecular  
339 evidence of person-to-person transmission of a pigmented strain of *Corynebacterium*  
340 *striatum* in intensive care units. *J Clin Microbiol* 32:164–169.
- 341 26. Cullen L, McClean S. 2015. Bacterial Adaptation during Chronic Respiratory Infections.  
342 *Pathogens* 4:66–89.
- 343 27. Larsson P, Brinkhoff B, Larsson L. 1987. *Corynebacterium diphtheriae* in the  
344 environment of carriers and patients. *J Hosp Infect* 10:282–286.
- 345

346

347

**Table 1.** Summary of the medical records of the four patients with positive *C. diphtheriae* isolates in expectoration samples

| Patient | Age/<br>Gen<br>der | Baseline lung<br>function                                     | Symptoms at the time<br>of positivity                    | Long-term or recurrent<br>antibiotic therapy                                                                | Date of<br>the first<br>positive<br>sample | Sampling | Other bacteria<br>(co-infection)                                 | Treatment<br>following<br>positivity              | Current<br>status   |
|---------|--------------------|---------------------------------------------------------------|----------------------------------------------------------|-------------------------------------------------------------------------------------------------------------|--------------------------------------------|----------|------------------------------------------------------------------|---------------------------------------------------|---------------------|
| 1       | 27/<br>F           | Non-invasive<br>ventilation, oxygen<br>requirement<br>FEV 30% | Chronic respiratory<br>failure                           | Amoxicillin,<br>cotrimoxazole for<br>exacerbations                                                          | Feb 2011                                   | Sputum   | <i>S. maltophilia</i><br><i>H. influenzae</i><br><i>E. coli</i>  | No treatment                                      | Deceased in<br>2013 |
| 2       | 25/<br>M           | FEV 106%                                                      | Asymptomatic in Apr<br>2015,<br>Exacerbation in Jul 2015 | Inhaled tobramycin for<br>one month on Jan 2014;<br>Ofloxacin, fusidic acid                                 | Apr 2015                                   | Sputum   | <i>S. aureus</i>                                                 | Fusidic acid,<br>ofloxacin                        | Alive               |
| 3       | 39/<br>M           | FEV 69%                                                       | Asymptomatic                                             | amoxicillin/clavulanic<br>acid, ofloxacin, amikacin<br>for exacerbation                                     | Jan 2016                                   | Sputum   | <i>S. aureus</i><br><i>A. baumannii</i><br><i>S. maltophilia</i> | No treatment                                      | Alive               |
| 4       | 23/<br>M           | FEV 75%                                                       | Exacerbation in Nov 2016                                 | Piperacillin/tazobactam,<br>teicoplanin, imipenem,<br>cotrimoxazole for<br>exacerbation in 2015 and<br>2016 | Nov 2016                                   | Sputum   | <i>S. aureus</i><br><i>Achromobacter</i><br><i>xylosoxidans</i>  | Amoxicillin/<br>clavulanic acid,<br>cotrimoxazole | Alive               |

348

349

350

FEV: force expiration volume

351 **Figure 1. Timeline of events and *C. diphtheriae* detection in four cystic fibrosis patients.**

352 Months correspond to different columns in the grid; inside each month, days (not shown) are  
353 distinguished as separate columns. The upper tree recapitulates the phylogenetic relationships  
354 among the isolates, which are indicated in red boxes, linked with dotted arrows to their  
355 respective patient and isolation time. The numbers of single nucleotide polymorphisms (SNP)  
356 per genome inferred to have occurred are given for each branch of the tree.

357

358

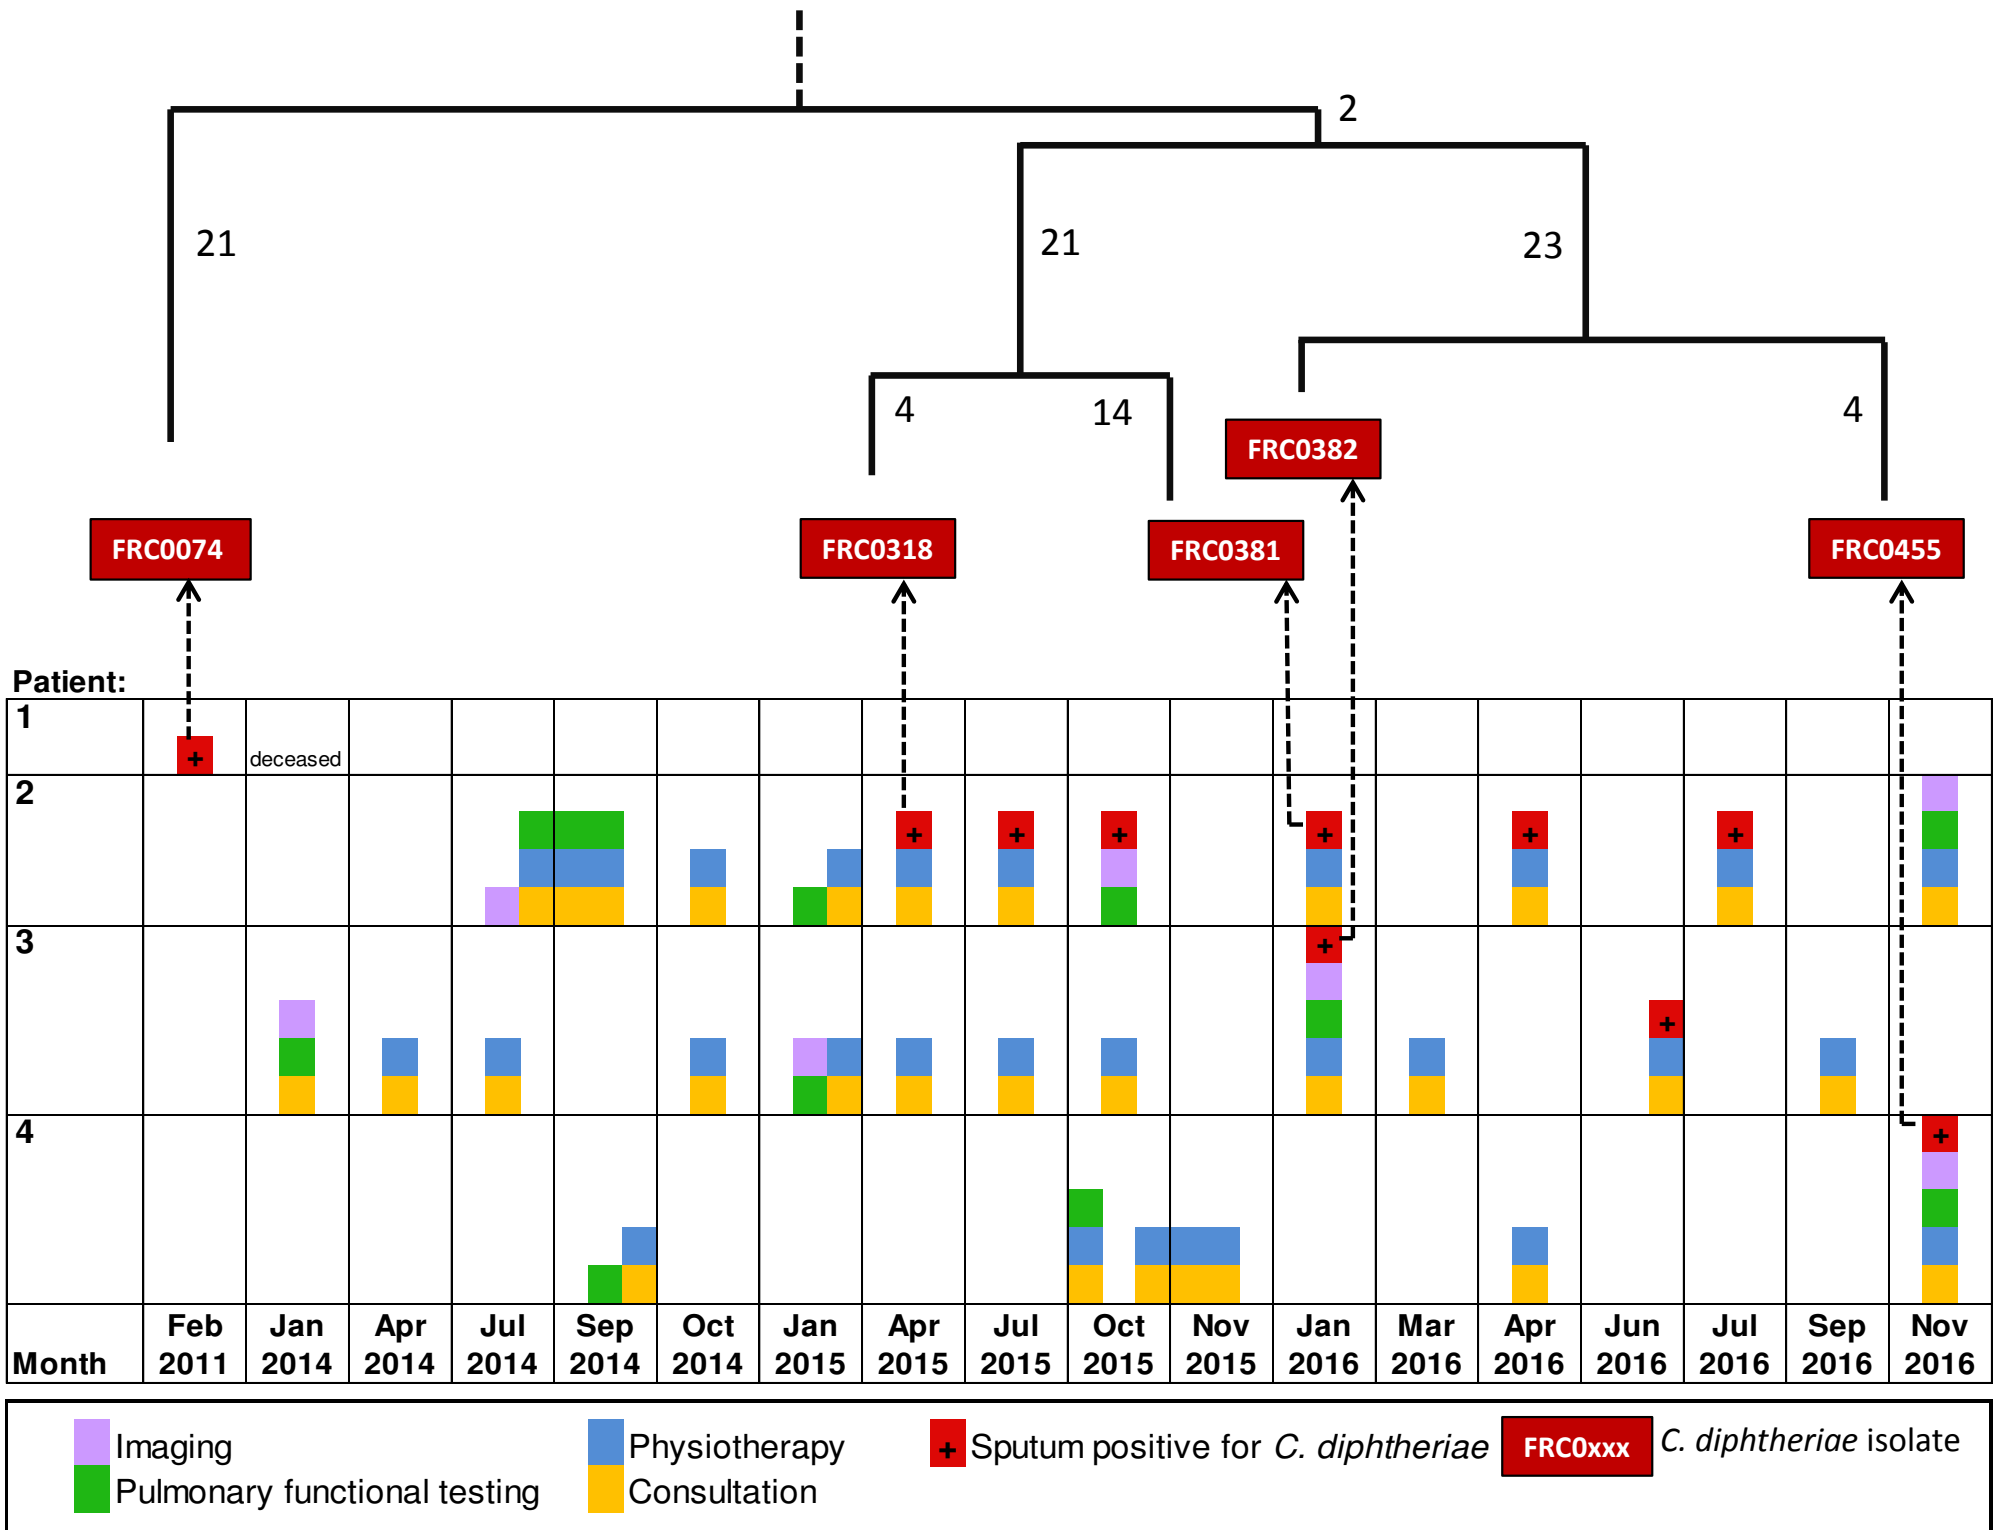

Source: https://www.biorxiv.org/content/10.1101/516880v1.full.pdf
